# Supplementary material
Source: publisher figshare collection journal article supplement (https://sage.figshare.com/ndownloader/files/22333083)
Supplement: Supplementary file 1 [file 22333083]

**Appendix A: Invitation letter wording by treatment (own translation from the German original)**

***Questionnaire only:***

**Subject: Job search survey of the University of Vienna**

Dear Sir or Madam,

In collaboration with the Ministry for Social Affairs we are conducting a survey on the subject of job search.

It takes about 5 minutes to fill in the questionnaire. Your answers are very important to us!

Your data will be treated as strictly confidential.

Please click on the following link for the questionnaire:

- To the questionnaire

Thank you very much for your support,

Prof. Bernhard Kittel, University of Vienna – Department of Economic Sociology

--------

This email has been sent to randomly selected (former) AMS-Clients in strict accordance with the data protection regulations. Please do not reply to this email directly. If you have any questions please contact [email].

***Questionnaire and video:***

**Subject: Job search survey of the University of Vienna**

Dear Sir or Madam,

In collaboration with the Ministry for Social Affairs we are conducting a survey on the subject of job search.

It takes about 5 minutes to fill in the questionnaire. Subsequently there is a 2-minute video. Please take some time to fill in the survey and watch the video. Your answers and your opinion of the video are very important to us!

Your data will be treated as strictly confidential.

Please click on the following link for the questionnaire and the video:

- To the questionnaire and the video

Thank you very much for your support,

Prof. Bernhard Kittel, University of Vienna – Department of Economic Sociology

--------

This email has been sent to randomly selected (former) AMS-Clients in strict accordance with the data protection regulations. Please do not reply to this email directly. If you have any questions please contact [email].

***Video and questionnaire:***

**Subject: Job search video of the University of Vienna**

Dear Sir or Madam,

In collaboration with the Ministry for Social Affairs we created a video on the subject of job search.

It takes 2 minutes. Subsequently there is a 5-minute questionnaire. Please take some time to watch the video and fill in the survey. Your opinion of the video and your answers are very important to us!

Your data will be treated as strictly confidential.

Please click on the following link for the video and the questionnaire:

- To the video and the questionnaire

Thank you very much for your support,

Prof. Bernhard Kittel, University of Vienna – Department of Economic Sociology

--------

This email has been sent to randomly selected (former) AMS-Clients in strict accordance with the data protection regulations. Please do not reply to this email directly. If you have any questions please contact [email].

***Video only:***

**Subject: Job search video of the University of Vienna**

Dear Sir or Madam,

In collaboration with the Ministry for Social Affairs we created a video on the subject of job search.

It takes 2 minutes. Please take some time to watch the video and tell us what you think about it. Your opinion is very important to us!

Your data will be treated as strictly confidential.

Please click on the following link for the video:

- To the video

Thank you very much for your support,

Prof. Bernhard Kittel, University of Vienna – Department of Economic Sociology

--------

This email has been sent to randomly selected (former) AMS-clients in strict accordance with the data protection regulations. Please do not reply to this email directly. If you have any questions please contact [email].

**Appendix B: Screenshots of the invitation letter on a mobile device (using Android E-Mail)**


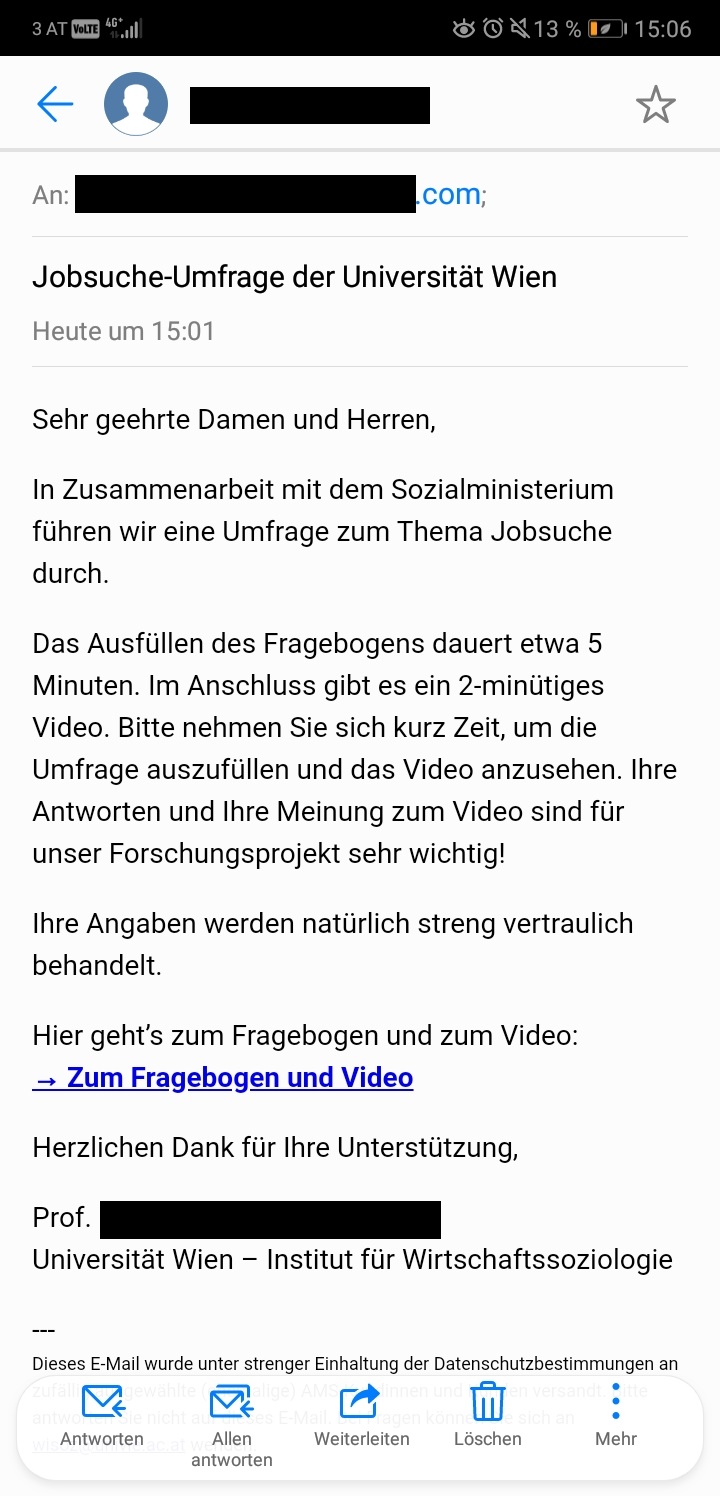
***Questionnaire only: Questionnaire and video:***

***
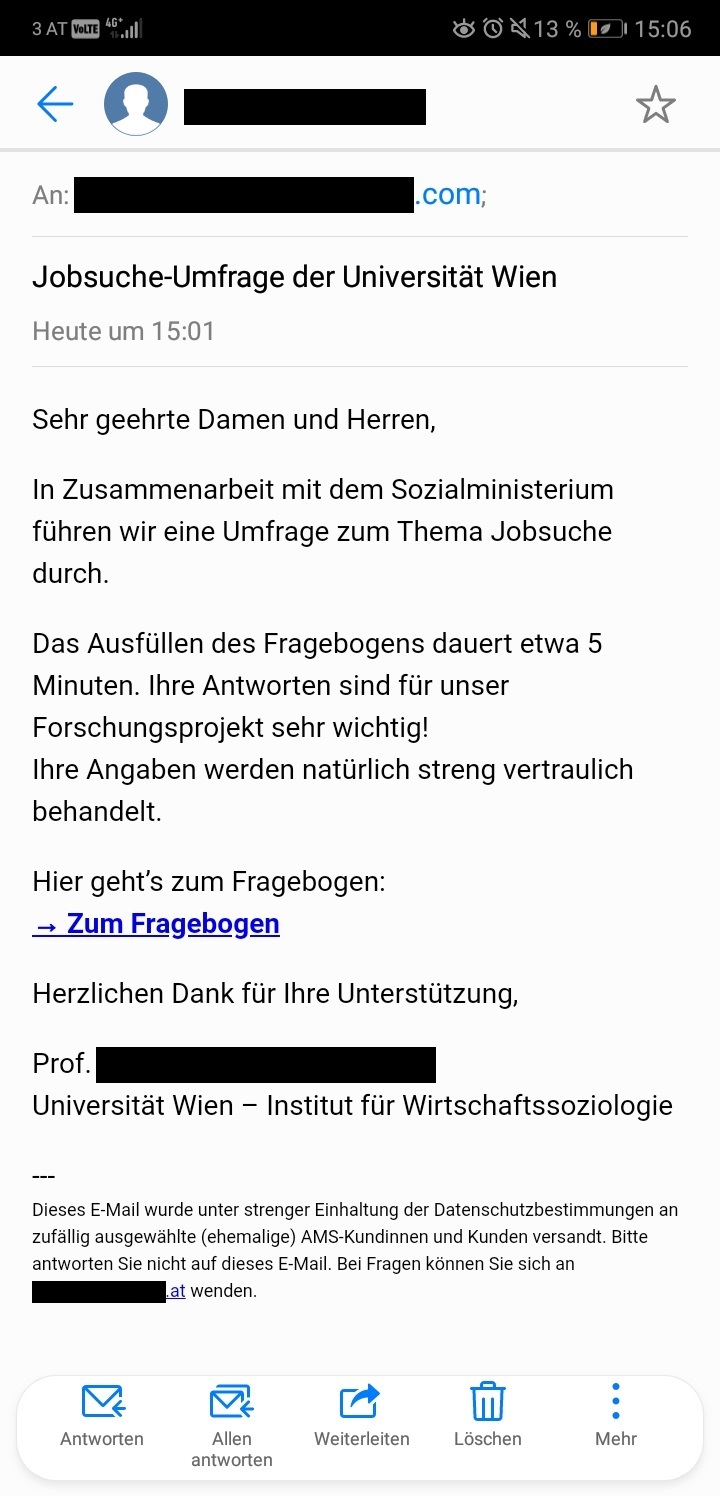
***


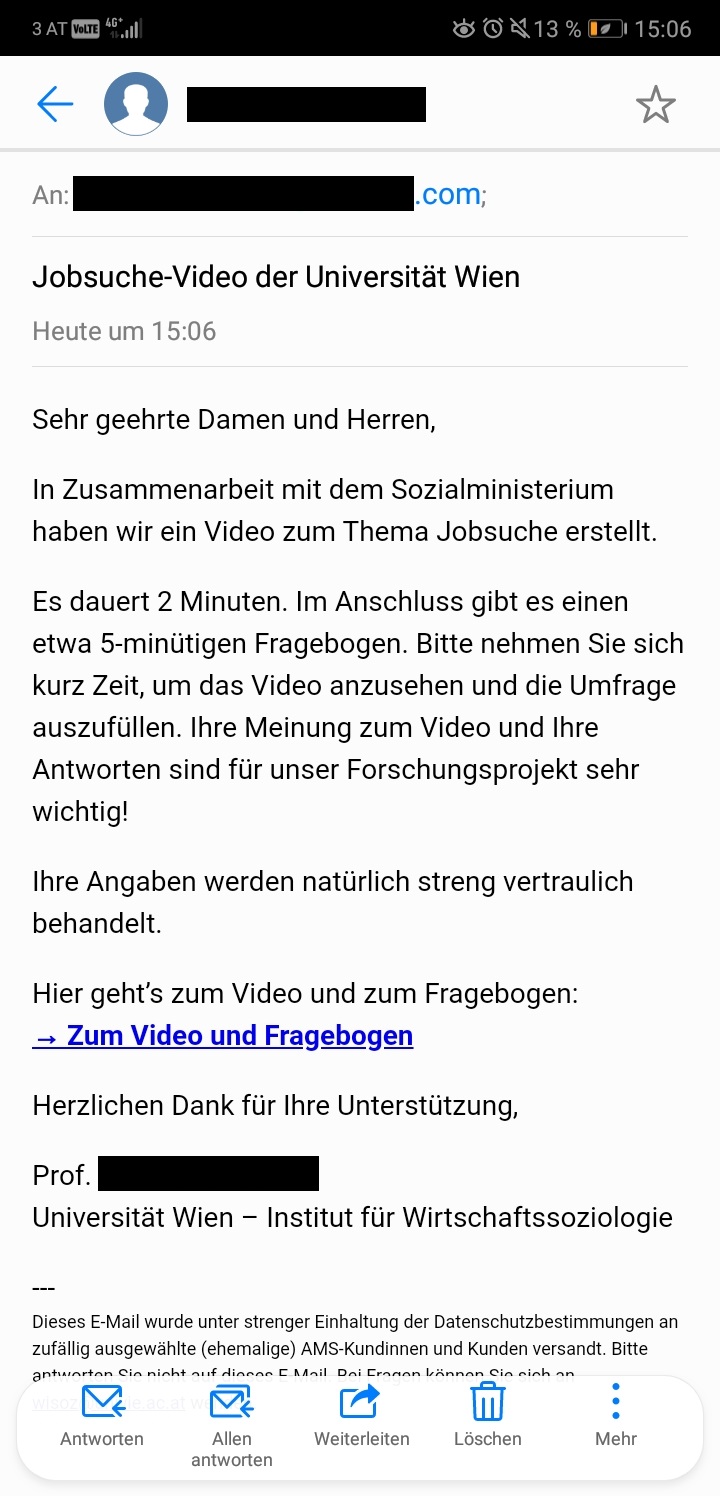
***Video and questionnaire: Video only:***

***
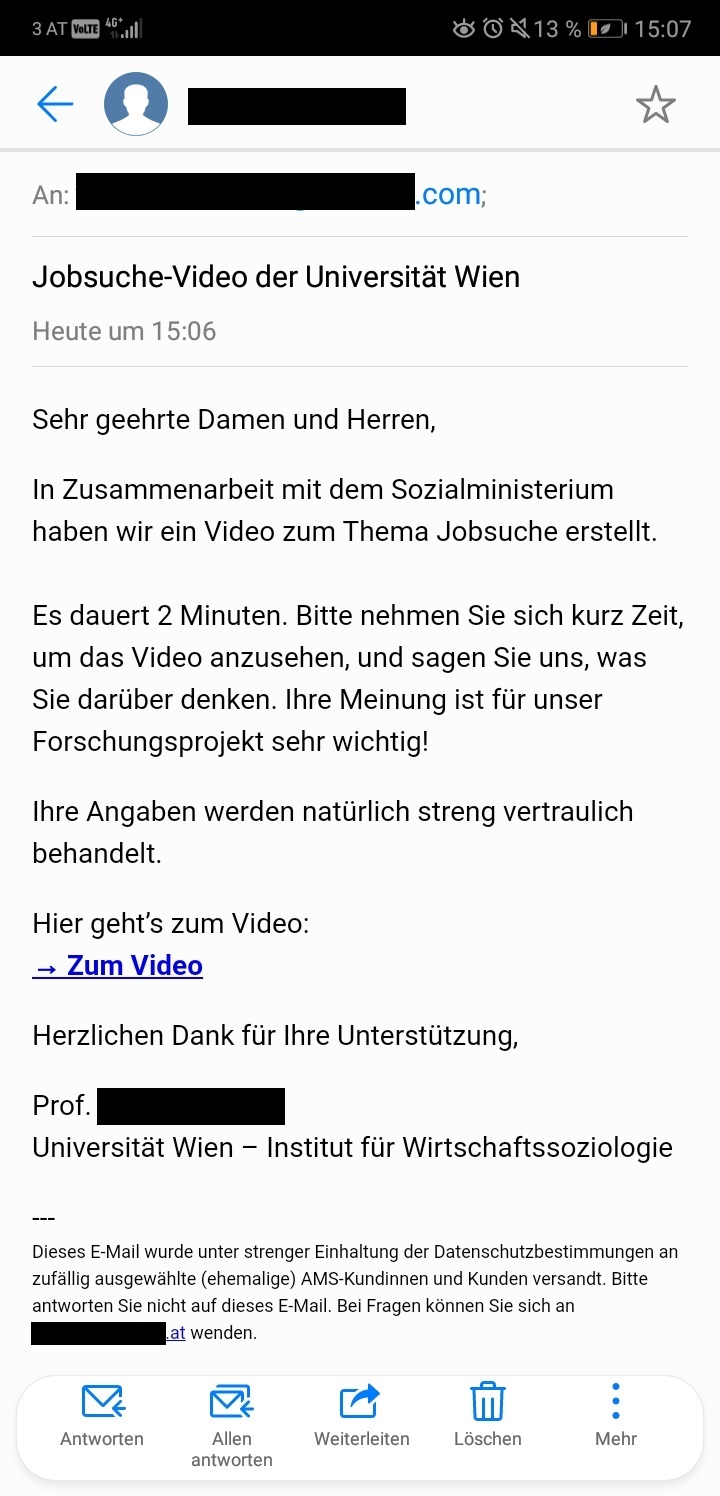
***

**Appendix C:**

Table 1: Click Rates, by Experimental Group and Respondent Characteristics; Unit (%)

|  | Experimental Groups | | | |  |  |
| --- | --- | --- | --- | --- | --- | --- |
|  | Questionnaire | Questionnaire + Video | Video + Questionnaire | Video | Total | n |
| Female | 17.74 | 10.89 | 8.53 | 10.34 | 11.9 | 13,847 |
| Male | 14.47 | 9.88 | 8.84 | 13.32 | 11.6 | 14,153 |
| Austrian | 15.77 | 9.49 | 7.30 | 10.01 | 10.6 | 16,763 |
| Non-Austrian | 16.59 | 11.65 | 10.79 | 14.61 | 13.4 | 11,237 |
| Unemployed | 13.98 | 6.82 | 4.80 | 9.45 | 12.3 | 22,989 |
| Employed | 16.59 | 11.00 | 9.41 | 12.32 | 8.79 | 4,333 |
| Primary | 14.42 | 9.74 | 8.74 | 10.98 | 11.1 | 9,683 |
| Lower Secondary | 15.44 | 9.38 | 6.78 | 10.16 | 10.5 | 10,743 |
| Higher Secondary | 17.56 | 10.86 | 9.87 | 14.30 | 13.1 | 4,497 |
| Tertiary | 22.13 | 15.11 | 13.53 | 16.91 | 16.9 | 2,954 |
| Total | 16.10 | 10.37 | 8.69 | 11.84 | 11.7 | 28,000 |

Table 2: Response Rates, by Experimental Group and Respondent Characteristics; Unit (%)

|  | Experimental Groups | | | |  |  |
| --- | --- | --- | --- | --- | --- | --- |
|  | Questionnaire | Questionnaire + Video | Video + Questionnaire | Video | Total | n |
| Female | 13.21 | 8.39 | 5.39 |  | 9.01 | 10,367 |
| Male | 9.20 | 6.26 | 4.39 |  | 6.61 | 10,633 |
| Austrian | 12.47 | 7.54 | 4.76 |  | 8.25 | 12,548 |
| Non-Austrian | 9.32 | 6.95 | 5.07 |  | 7.12 | 8,452 |
| Unemployed | 11.66 | 7.71 | 5.31 |  | 8.22 | 17,217 |
| Employed | 9.20 | 4.95 | 2.49 |  | 5.58 | 3,264 |
| Primary | 8.58 | 5.96 | 3.49 |  | 6.00 | 7,270 |
| Lower Secondary | 11.08 | 6.99 | 3.93 |  | 7.37 | 8,055 |
| Higher Secondary | 12.85 | 8.04 | 6.16 |  | 9.00 | 3,378 |
| Tertiary | 18.07 | 11.61 | 10.74 |  | 13.40 | 2,209 |
| Total | 11.20 | 7.30 | 4.89 |  | 7.80 | 21,000 |

**Appendix D:**

Table 1: Full logistic regression estimates of click and response (log-odds)

|  | Click | | Response | |
| --- | --- | --- | --- | --- |
|  | (1) | (2) | (3) | (4) |
| Questionnaire-Video (Ref: Questionnaire) | -0.527*** | -0.762*** | -0.490*** | -0.654** |
|  | (0.052) | (0.184) | (0.061) | (0.219) |
| Video-Questionnaire | -0.716*** | -1.108*** | -0.930*** | -1.575*** |
|  | (0.054) | (0.202) | (0.069) | (0.272) |
| Video | -0.367*** | -0.385* |  |  |
|  | (0.050) | (0.172) |  |  |
| Female (Ref: male) | -0.008 | 0.203** | 0.276*** | 0.329*** |
|  | (0.038) | (0.067) | (0.054) | (0.079) |
| Age | 0.004 | 0.004 | 0.002 | 0.002 |
|  | (0.004) | (0.004) | (0.006) | (0.006) |
| Lower Secondary (ISCED 3) (Ref: Primary ISCED 1-2) | 0.011 | 0.078 | 0.170* | 0.199* |
|  | (0.047) | (0.081) | (0.068) | (0.098) |
| Higher Secondary (ISCED 4-5) | 0.237*** | 0.197* | 0.389*** | 0.367** |
|  | (0.057) | (0.100) | (0.080) | (0.119) |
| Tertiary (ISCED 6-8) | 0.526*** | 0.481*** | 0.836*** | 0.765*** |
|  | (0.064) | (0.111) | (0.086) | (0.127) |
| Non-Austrian (Ref. Austrian) | 0.266*** | 0.079 | -0.151** | -0.304*** |
|  | (0.039) | (0.069) | (0.056) | (0.083) |
| Unemployed (Ref. employed) | 0.368*** | 0.191* | 0.427*** | 0.270* |
|  | (0.058) | (0.094) | (0.082) | (0.113) |
| Questionnaire-Video * female |  | -0.111 |  | -0.047 |
|  |  | (0.105) |  | (0.123) |
| Video-Questionnaire * female |  | -0.262* |  | -0.171 |
|  |  | (0.110) |  | (0.139) |
| Video * female |  | -0.545*** |  |  |
|  |  | (0.102) |  |  |
| Questionnaire-Video * Lower Secondary |  | -0.067 |  | -0.072 |
|  |  | (0.129) |  | (0.154) |
| Video-Questionnaire * Lower Secondary |  | -0.236+ |  | -0.030 |
|  |  | (0.136) |  | (0.183) |
| Video * Lower Secondary |  | -0.042 |  |  |
|  |  | (0.125) |  |  |
| Questionnaire-Video * Higher Secondary |  | -0.042 |  | -0.079 |
|  |  | (0.155) |  | (0.183) |
| Video-Questionnaire * Higher Secondary |  | -0.014 |  | 0.233 |
|  |  | (0.162) |  | (0.208) |
| Video * Higher Secondary |  | 0.208 |  |  |
|  |  | (0.148) |  |  |
| Questionnaire-video * Tertiary |  | 0.013 |  | -0.120 |
|  |  | (0.167) |  | (0.192) |
| Video-Questionnaire* Tertiary |  | 0.076 |  | 0.468* |
|  |  | (0.171) |  | (0.207) |
| Video * Tertiary |  | 0.116 |  |  |
|  |  | (0.163) |  |  |
| Questionnaire-Video * non-Austrian |  | 0.142 |  | 0.219+ |
|  |  | (0.107) |  | (0.129) |
| Video-Questionnaire* non-Austrian |  | 0.326** |  | 0.383** |
|  |  | (0.112) |  | (0.144) |
| Video * non-Austrian |  | 0.356*** |  |  |
|  |  | (0.103) |  |  |
| Questionnaire-Video * Unemployed |  | 0.305+ |  | 0.199 |
|  |  | (0.160) |  | (0.188) |
| Video-Questionnaire * Unemployed |  | 0.514** |  | 0.529* |
|  |  | (0.177) |  | (0.234) |
| Video * Unemployed |  | 0.106 |  |  |
|  |  | (0.147) |  |  |
| Constant | -2.295*** | -2.186*** | -2.811*** | -2.641*** |
|  | (0.130) | (0.155) | (0.183) | (0.203) |
| Observations | 27,201 | 27,201 | 20,394 | 20,394 |
| Akaike Inf. Crit. | 19,332.870 | 19,301.670 | 10,798.370 | 10,796.520 |
| *Note:* | +p<0.1,*p<0.05,**p<0.01,***p<0.001 | | | |

**Appendix D**

Figure 1: Predicted response probabilities for different treatments by employment status (indicating topic interest), gender, citizenship, and education

A B


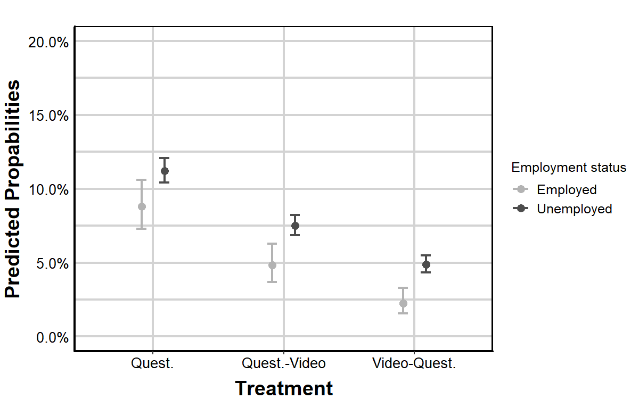

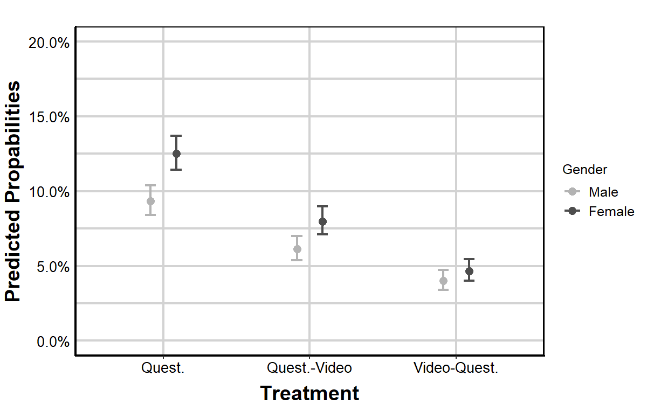


C D


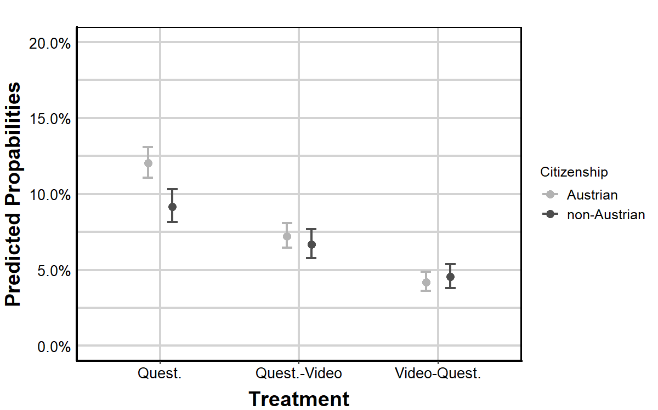

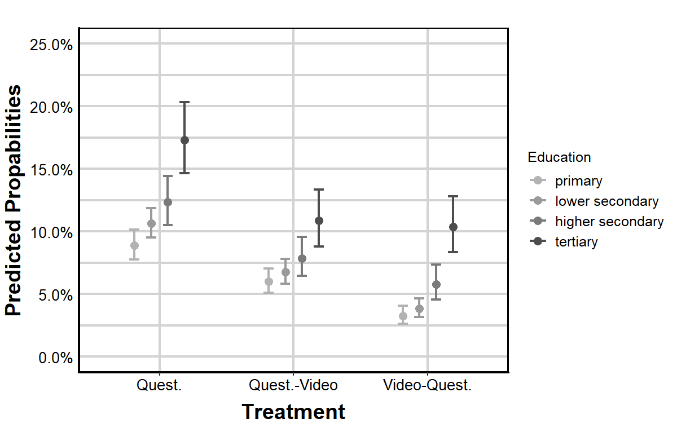


Note: Estimates are based on Model 4 in Table 1. Predicted probabilities with 95% confidence intervals are calculated holding other variables at their mean.

**Appendix E:** Share of devices used by respondents

|  | | |  |
| --- | --- | --- | --- |
|  | Desktop/Tablet | Smartphone | Chi-squared test |
|  | | |  |
| Questionnaire | 30.3% | 69.7% | χ2 = .57, p=.45 |
| Video | 32.0% | 68.0% |
| Questionnaire-video | 32.0% | 68.0% | χ2 = .28, p=.60 |
| Video-questionnaire | 33.6% | 66.4% |
|  | | |  |
| N= 3257 | | |  |
